# Supplementary material
Source: PubMed Central journal article supplement (PMC4101700)
Supplement: NIHMS599531-supplement-Supplement1.pdf [file NIHMS599531-supplement-Supplement1.pdf]

## Supplementary Appendix

This appendix has been provided by the authors to give readers additional information about their work.

Supplement to: The ProCESS Investigators. A randomized trial of protocol-based care for early septic shock. N Engl J Med 2014;370:1683-93. DOI: 10.1056/NEJMoa1401602

# Supplementary Materials for

## A Randomized Trial of Protocol-based Care for Early Septic Shock

The ProCESS Investigators

### Table of contents

| <b>Content</b>                                                                           | <b>Page</b> |
|------------------------------------------------------------------------------------------|-------------|
| Collaborators                                                                            |             |
| The ProCESS Investigators                                                                | 2           |
| Data Safety and Monitoring Board                                                         | 3           |
| Supplementary methods                                                                    |             |
| Exclusion criteria                                                                       | 4           |
| Systemic inflammatory response syndrome criteria                                         | 4           |
| Site team training                                                                       | 4           |
| Supplementary figures                                                                    |             |
| Figure S1. – Protocol for Early Goal-Directed Therapy (EGDT)                             | 6           |
| Figure S2. – Protocol for Standard Therapy                                               | 7           |
| Figure S3. – Assessment of adherence to protocol for EGDT                                | 8           |
| Figure S4. – Assessment of adherence to protocol for Standard Therapy                    | 9           |
| Figure S5. – Enrollment over time                                                        | 10          |
| Figure S6. – Processes of care during the six hour resuscitation                         | 11          |
| Supplementary tables                                                                     |             |
| Table S1. – Additional socio-demographic characteristics                                 | 12          |
| Table S2. – Severity of illness, vital signs, and laboratory values from baseline to 72h | 13          |
| Table S3. – Protocol adherence failures                                                  | 15          |
| Table S4. – Resuscitation and processes of care from baseline to 72h                     | 16          |
| Table S5. – Serious adverse events                                                       | 17          |
| Table S6. – Pre-hoc subgroup-by-treatment interaction analyses                           | 17          |
| Table S7. – Post-hoc subgroup analyses                                                   | 18          |
| Table S8. – Comparison of study populations across EGDT trials                           | 19          |
| References                                                                               | 20          |

## The ProCESS Investigators

The members of the ProCESS Trial are as follows: **Coordinating Center:** Derek C. Angus, Amber E. Barnato, Tammy L. Eaton, Elizabeth Gimbel, David T. Huang, Christopher Keener, John A. Kellum, Kyle Landis, Francis Pike, Diana K. Stapleton, Lisa A. Weissfeld, Michael Willochell, Kourtney A. Wofford, Donald M. Yealy. **Recruiting Centers:** (Site Principal Investigators are listed in Italics) - Advocate Christ Medical Center, Oak Lawn, IL - *Erik Kulstad, Hannah Watts*. Allegheny General Hospital, Pittsburgh, PA - *Arvind Venkat*. Brigham and Women's Hospital, Boston, MA - *Peter C. Hou, Anthony Massaro, Siddharth Parmar*. Duke University Medical Center, Durham, NC - *Alexander T. Limkakeng, Jr.* East Carolina University, Greenville, NC - *Kori Brewer, Theodore R. Delbridge, Allison Mainhart*. George Washington University Medical Center, Washington, DC - *Lakhmir S. Chawla*. Hennepin County Medical Center, Minneapolis, MN - *James R. Miner*. Intermountain Medical Center, Murray, UT - *Todd L. Allen, Colin K. Grissom*, Los Angeles County + USC Medical Center, Los Angeles, CA - *Stuart Swadron*. Louisiana State University Health Sciences Center, Shreveport, LA - *Steven A. Conrad*. Maricopa Medical Center, Phoenix, AZ - *Richard Carlson, Frank LoVecchio*. Massachusetts General Hospital, Boston, MA - *Ednan K. Bajwa, Michael R. Filbin*. Blair A. Parry. Methodist Research Institute, Indianapolis, IN - *Timothy J. Ellender*. North Shore University Hospital, Manhasset, NY - *Andrew E. Sama*. Norwalk Hospital, Norwalk, CT - *Jonathan Fine*. Penn State Hershey College of Medicine, Hershey, PA - *Soheil Nafeei, Thomas Terndrup, Margaret Wojnar*. Stanford University School of Medicine, Stanford, CA - *Ronald G. Pearl*. Summa Health System, Akron, OH - *Scott T. Wilber*. SUNY Downstate Medical Center, Brooklyn, NY - *Richard Sinert*.

Tampa General Hospital, Tampa, FL - *David J. Orban*, Jason W. Wilson. Temple University Hospital, Philadelphia, PA - *Jacob W. Ufberg*. UC Davis Medical Center, Sacramento, CA - *Timothy Albertson*, *Edward A. Panacek*. University Medical Center Brackenridge, Austin, TX - *Sohan Parekh*. UPMC Presbyterian/Shadyside, Pittsburgh, PA - *Scott R. Gunn*, Jon S. Rittenberger, *Richard J. Wadas*. University of Alabama at Birmingham, Birmingham, AL - Andrew R. Edwards, Matthew Kelly, *Henry E. Wang*, University of Arkansas for Medical Sciences, Little Rock, AR - *Talmage M. Holmes*. University of Maryland at Baltimore, Baltimore, MD - *Michael T. McCurdy*. University of Minnesota Medical Center, Fairview, MN - *Craig Weinert*. University of Utah Health Sciences Center, Salt Lake City, UT - *Estelle S. Harris*. Vanderbilt University Medical Center, Nashville, TN - *Wesley H. Self*, Diane Dubinski. Washington Hospital Center, Washington, DC - *Carolyn A. Phillips*, Ronald M. Miguez.

### **Data Safety and Monitoring Board**

Gordon R. Bernard, Vanderbilt University; Donald A. Berry, MD Anderson Cancer Center; Daniel W. Brock, Harvard University; Avital Cnaan, Children's National Medical Center; Norman C. Fost, University of Wisconsin; Roger J. Lewis (chair), Harbor-UCLA Medical Center; Avery B. Nathans, University of Toronto, and; Gordon D. Rubinfeld, University of Toronto.

## Supplementary methods

### Systemic inflammatory response syndrome criteria

We required patients to have  $\geq 2$  of the following 4 criteria: i.) temperature  $>38^{\circ}\text{C}$  or  $<36^{\circ}\text{C}$ ; ii.) heart rate  $>90$  beats per minute; iii.) respiratory rate  $>20$  breaths per minute or  $\text{PaCO}_2 <32$  mm Hg; and, iv.) white blood cell count  $>12,000/\text{mm}^3$ ,  $<4,000/\text{mm}^3$ , or  $>10\%$  immature (band) forms.<sup>1</sup>

### Exclusion criteria

We excluded patients who had: a primary diagnosis of acute cerebral vascular event, acute coronary syndrome, acute pulmonary edema, status asthmaticus, major cardiac arrhythmia, active gastrointestinal hemorrhage, seizure, drug overdose, burn or trauma; a requirement for immediate surgery; a known  $\text{CD4}$  count  $<50/\text{mm}^2$ ; an advance directive that would restrict protocol implementation; a contraindication to central venous catheterization; a high likelihood of refusing blood transfusion (e.g., Jehovah's Witness); a treating physician who deemed resuscitation to be futile; on-going participation in another interventional study; known pregnancy, or; been transferred from another hospital.

### Site team training and conduct

The coordinating center led site training meetings and conducted site visits prior to launch. We used a "train the trainer" approach, where coordinating center investigators trained site principal investigators and coordinators, who then trained any added site study members. We provided training materials via secure website to all sites. The coordinating center provided 24 hour/day telephone access for support and logistical advice, but all clinical judgment and

decision-making rested with the local team. For both protocol arms, the resuscitation teams were in charge of all resuscitation aspects of care, but the treating physician retained control of other care decisions, such as initiation of antibiotics. The resuscitation teams could have other clinical responsibilities but were responsible for ensuring that monitoring evaluations and interventions were executed as per the timed instructions of the protocol. We conducted site visits and held scheduled conference calls to assess conduct and to provide feedback and targeted additional training.

### Supplementary Figures

**Figure S1. – Protocol for early goal-directed therapy (EGDT).**

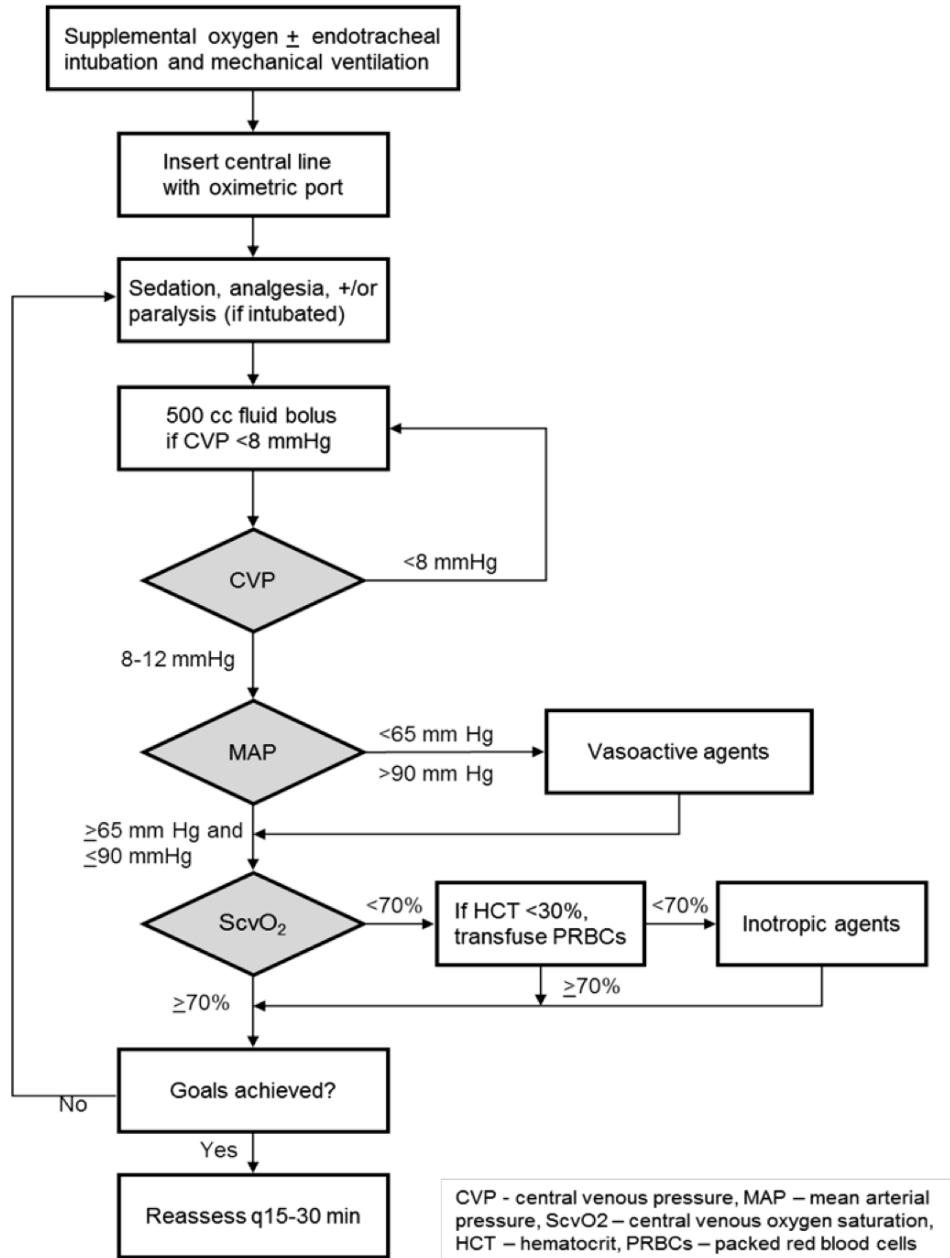

Figure S2. – Protocol for Standard Therapy.

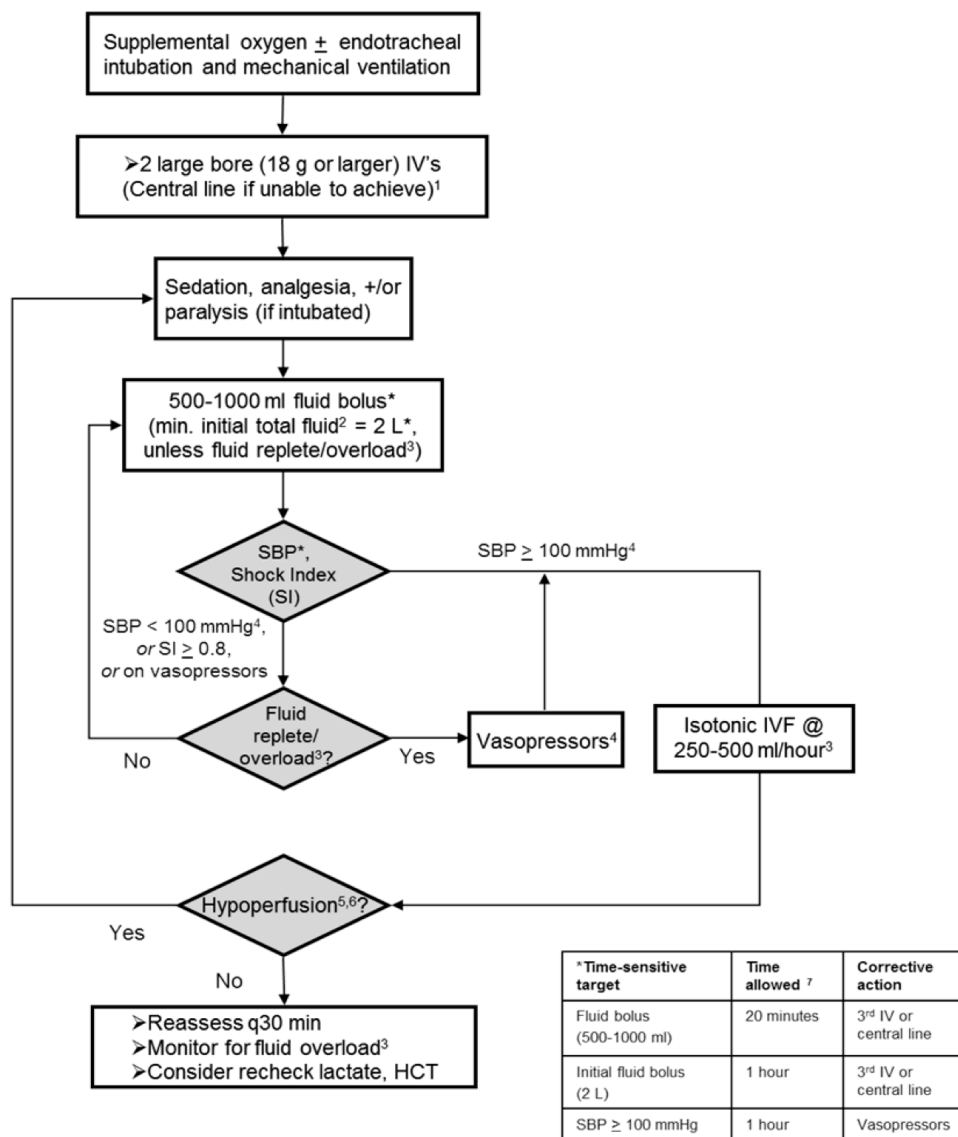

IVF – intravenous fluids; HCT – hematocrit; SBP – systolic blood pressure; SI – shock index; CVP – central venous pressure; ScvO<sub>2</sub> – central venous oxygen saturation; MAP – mean arterial pressure; PRBC – packed red blood cells.

- Central line should only be placed and used for venous access. During the 6h intervention, CVP and ScvO<sub>2</sub> measurements are discouraged. If time-sensitive fluid targets can be achieved with smaller IVs (e.g., one 18g and one 20g), that is acceptable.
- Only isotonic fluid should be used (e.g., saline, lactated Ringer's). Colloids are neither encouraged nor excluded.
- Fluid replete/overload is defined here as a clinical diagnosis by the treating ProCESS Investigator. Signs and symptoms of overload include jugular venous distention, rales, and decreased pulse oximetry readings. Discontinue all IVF (boluses, background rate) once this occurs, until no longer deemed fluid replete/overload.
- If patient's SBP is within 10% of known baseline SBP, AND patient is not deemed to be clinically hypoperfused, the SBP>100 mmHg target can be deemed fulfilled. Arterial lines allowed if deemed necessary, but not mandatory. Shock index = heart rate / systolic blood pressure.
- Hypoperfusion is defined here as a clinical diagnosis by the treating ProCESS Investigator. Signs and symptoms include, but are not limited to, MAP < 65 despite SBP > 100, arterial lactate > 4, mottled skin, oliguria, and altered sensorium.
- Transfuse PRBCs for Hgb < 7.5 g/dL.
- From time of prompt by protocol (i.e., not from time of physician order, or from when intravenous fluid bag hung).



Figure S3. – EGDT protocol adherence decision nodes at 6 hours.

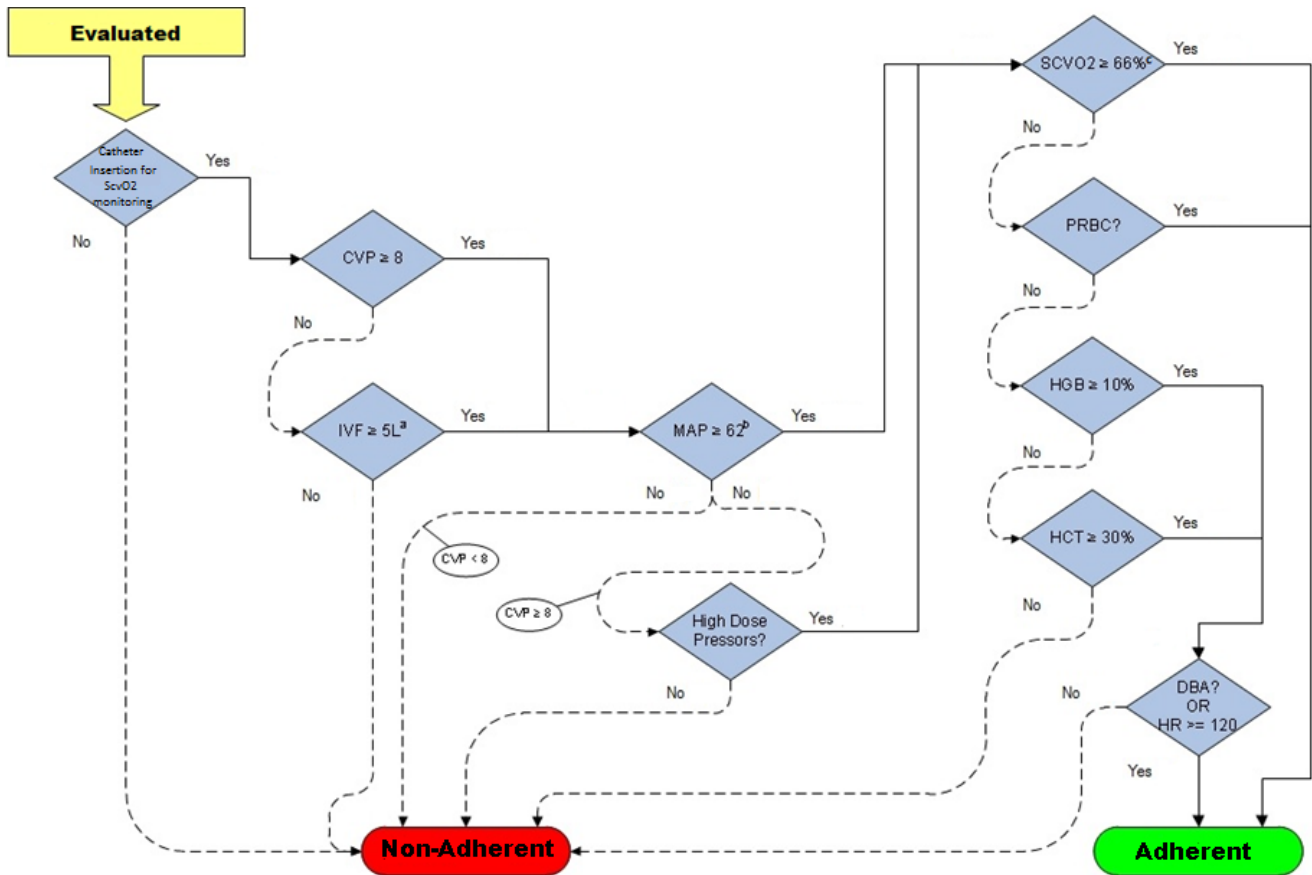

Protocol adherence was assessed by determining adherence to a set of decision nodes prompted by clinical status. Schematics for the decision nodes for EGDT at 6h are presented above. IVF – intravenous fluids; ScvO<sub>2</sub> – central venous oxygen saturation; MAP – mean arterial pressure; PRBC – packed red blood cell transfusion; HCT – hematocrit; DBA – dobutamine; HR – heart rate.

<sup>a</sup> IVF ≥ 5 or ScvO<sub>2</sub> ≥ 66%

<sup>b</sup> MAP ≥ 62mmHg or (MAP ≥ 55mmHg and ScvO<sub>2</sub> ≥ 66%). We allowed a MAP of 62 to compensate for the variation in the calculation of MAP across different automated blood pressure monitors.

<sup>c</sup> +/- 2% around ScvO<sub>2</sub> measurement error deemed as meeting target.

**Figure S4. – Standard Therapy protocol adherence decision nodes at 6 hours.**

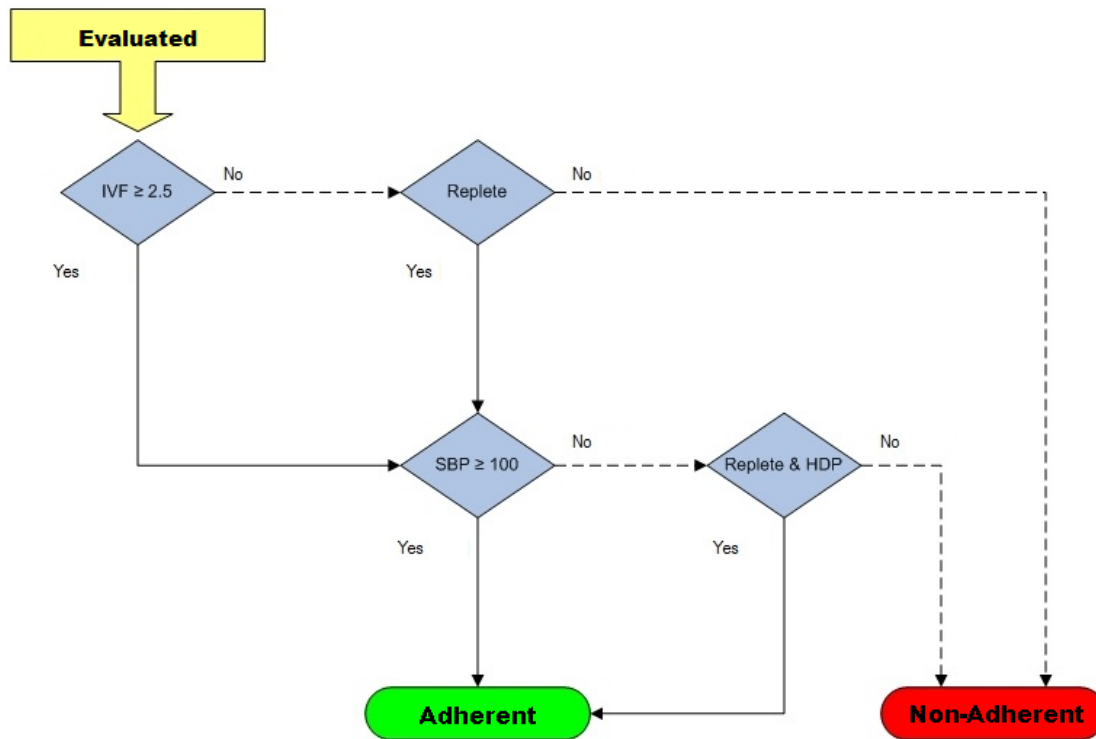

Protocol adherence was assessed by determining adherence to a set of decision nodes prompted by clinical status. Schematics for the decision nodes for PSC at 6h are presented above. IVF – intravenous fluids (volume expressed in liters); SBP – systolic blood pressure (units expressed in mmHg); HDP – high dose pressors.

**Figure S5. – Enrollment over time.**

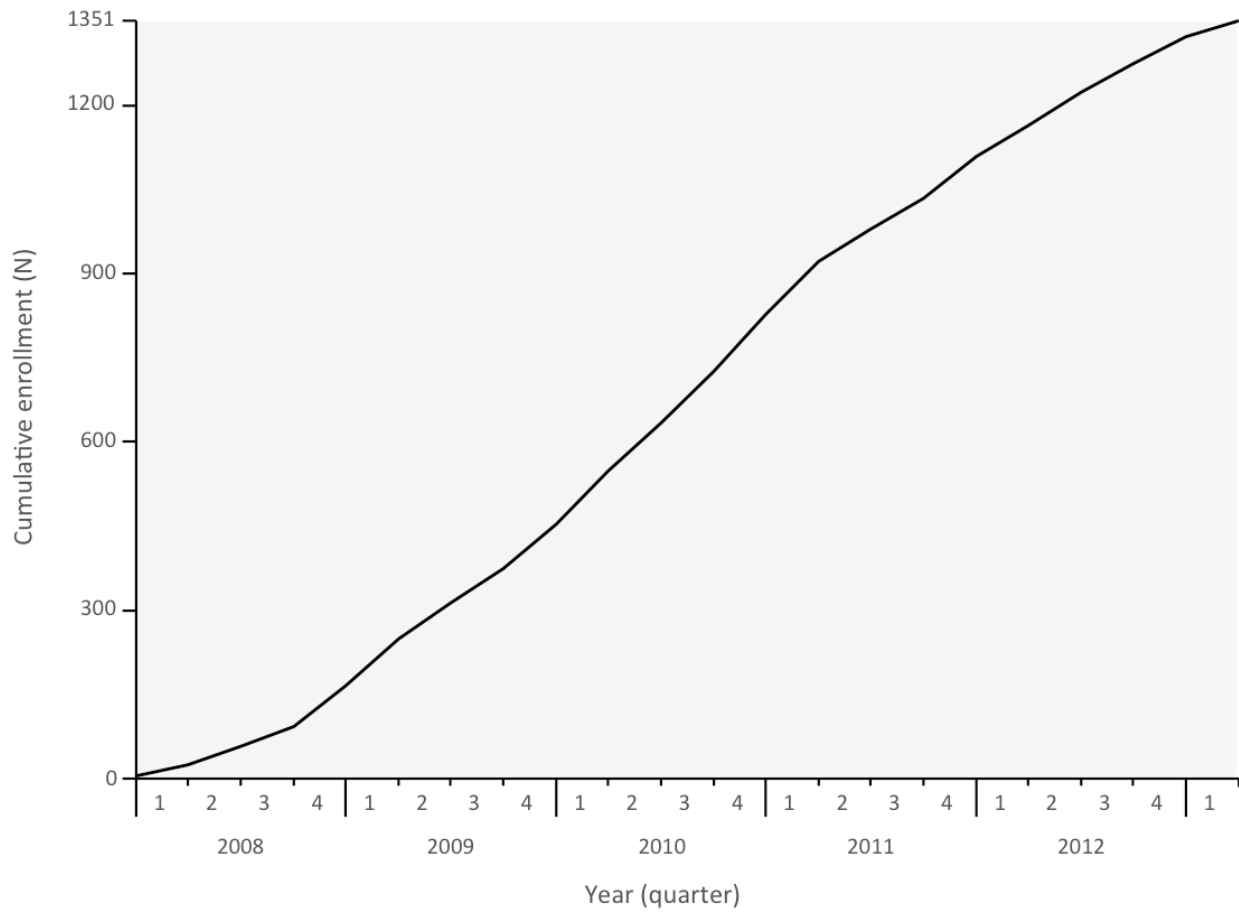

**Figure S6. Processes of care during the 6h resuscitation intervention.**

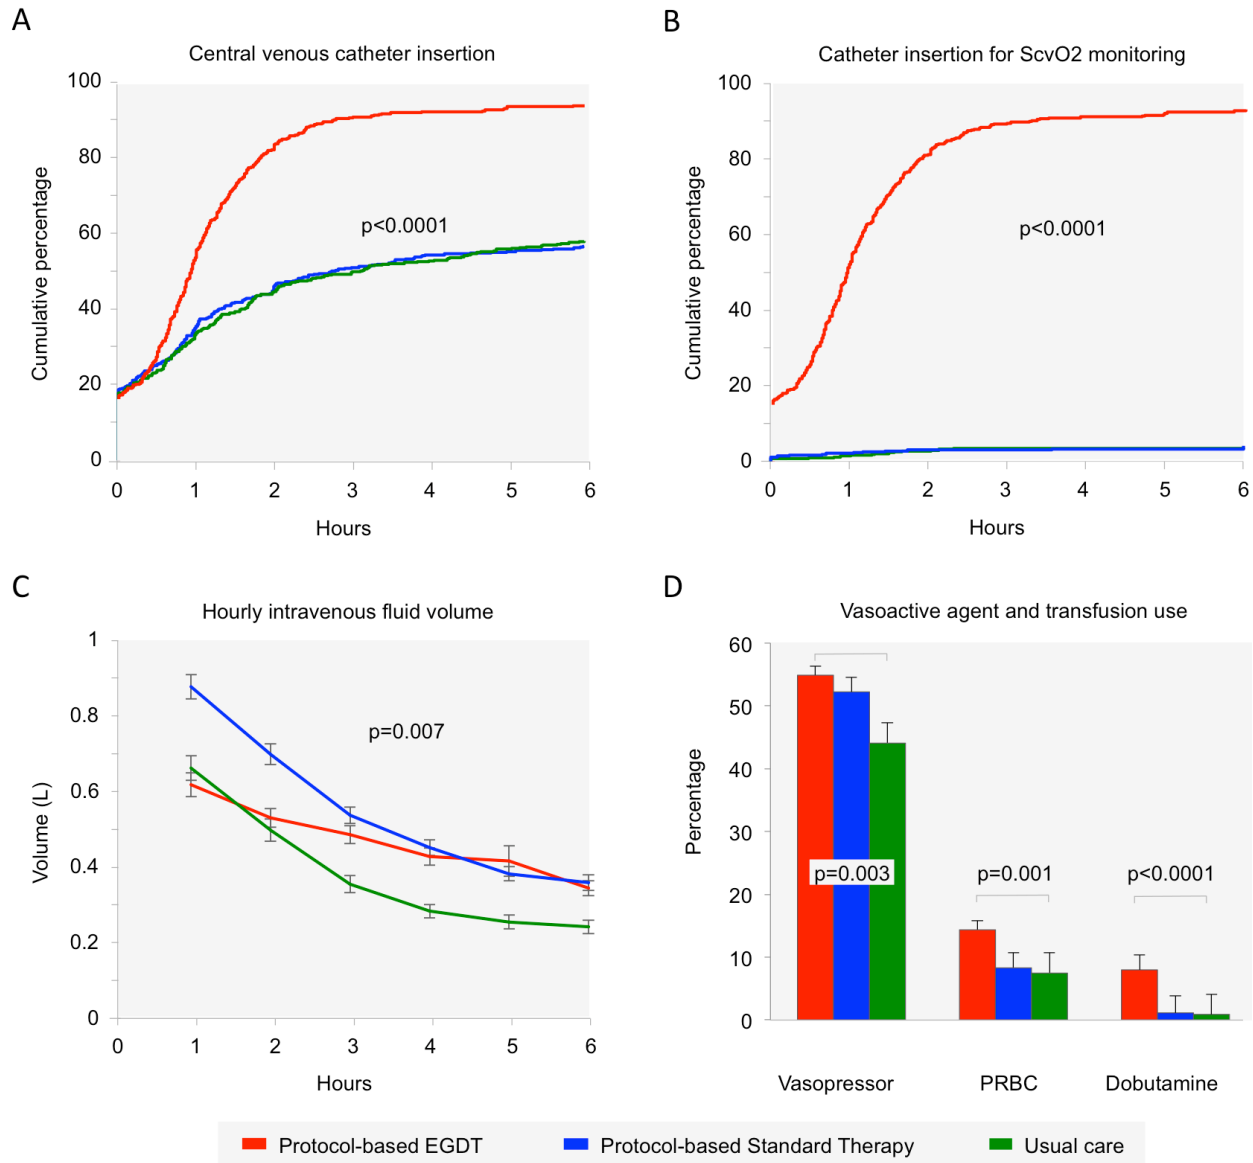

Panel A – time (minutes) until a central venous catheter is placed. Panel B – time (minutes) until a central venous catheter for oximetric monitoring is placed. Central venous catheterization defined as use of oximetric catheter or multiple serial ScvO<sub>2</sub> measures. Panel C – Intravenous fluid volume by hour (mean ± SD). Panel D – use of resuscitation interventions. ScvO<sub>2</sub> – central venous oxygen saturation; PRBC – packed red blood cell; EGDT – early goal-directed therapy.. P-values represent comparisons across the 3 arms.

## Supplementary Tables

**Table S1. – Additional sociodemographic characteristics of the patients.<sup>a</sup>**

| Characteristic                  | Protocol-based<br>EGDT (N=439) | Protocol-based Standard<br>Therapy (N=446) | Usual care (N=456) |
|---------------------------------|--------------------------------|--------------------------------------------|--------------------|
| Race <sup>b</sup>               |                                |                                            |                    |
| White                           | 296 (67.4)                     | 308 (69.1)                                 | 312 (68.4)         |
| Black or African American       | 110 (25.1)                     | 111 (24.9)                                 | 112 (24.6)         |
| Asian                           | 10 (2.3)                       | 6 (1.3)                                    | 10 (2.2)           |
| Other                           | 23 (5.2)                       | 21 (4.7)                                   | 22 (4.7)           |
| Ethnicity <sup>c</sup>          |                                |                                            |                    |
| Non-Hispanic                    | 394 (89.7)                     | 396 (88.8)                                 | 406 (89.0)         |
| Hispanic                        | 44 (10.0)                      | 50 (11.2)                                  | 49 (10.7)          |
| Chronic conditions <sup>d</sup> |                                |                                            |                    |
| Hypertension                    | 258 (58.8)                     | 260 (58.3)                                 | 271 (59.4)         |
| Diabetes mellitus               | 137 (31.2)                     | 160 (35.9)                                 | 161 (35.3)         |
| Chronic respiratory disease     | 91 (20.7)                      | 96 (21.5)                                  | 111 (24.3)         |
| Cancer                          | 72 (16.4)                      | 76 (17.0)                                  | 86 (18.9)          |
| Renal impairment                | 71 (16.2)                      | 59 (13.2)                                  | 83 (18.2)          |
| Congestive heart failure        | 54 (12.3)                      | 51 (11.4)                                  | 56 (12.3)          |
| Prior myocardial infarction     | 43 (9.8)                       | 52 (11.7)                                  | 48 (10.5)          |
| Cerebral vascular disease       | 44 (10.0)                      | 39 (8.7)                                   | 43 (9.4)           |
| Peripheral vascular disease     | 35 (8.0)                       | 34 (7.6)                                   | 41 (9.0)           |
| Chronic dementia                | 26 (5.9)                       | 37 (8.3)                                   | 37 (8.1)           |
| Hepatic cirrhosis               | 33 (7.5)                       | 22 (4.9)                                   | 32 (7.0)           |
| Peptic ulcer disease            | 25 (5.7)                       | 23 (5.2)                                   | 24 (5.3)           |
| AIDS and related syndromes      | 17 (3.9)                       | 9 (2.0)                                    | 12 (2.6)           |

EGDT – early goal-directed therapy.. There were no differences in baseline characteristics across arms.

<sup>a</sup> Values indicated with  $\pm$  are means  $\pm$  SD. Values indicated with N (n) are number of patients (%).

<sup>b</sup> Race determined by patient self-report, or by patient's legally authorized representative.

<sup>c</sup> Excludes two subjects with missing ethnicity.

<sup>d</sup> Chronic conditions defined as per Charlson comorbidity index.<sup>3</sup>

Table S2. – Severity of illness, vital signs, and laboratory values from baseline to 72h.

| Variable                         | Baseline      | 6h                | 24h          | 48h          | 72h          |
|----------------------------------|---------------|-------------------|--------------|--------------|--------------|
| <b>Severity of illness index</b> |               |                   |              |              |              |
| APACHE II                        |               |                   |              |              |              |
| Protocol-based EGDT              | 20.8 ± 8.1    | -                 | 22.1 ± 8.3   | 17.2 ± 6.8   | 16.8 ± 6.6   |
| Protocol-based Standard Therapy  | 20.6 ± 7.4    | -                 | 22 ± 8.8     | 17.1 ± 6.8   | 16.9 ± 6.4   |
| Usual care                       | 20.7 ± 7.5    | -                 | 21.6 ± 8.3   | 17.6 ± 6.5   | 16.7 ± 6.3   |
| p-value                          | 0.90          | -                 | 0.61         | 0.59         | 0.87         |
| APACHE acute physiology score    |               |                   |              |              |              |
| Protocol-based EGDT              | 15.1 ± 7      | -                 | 16.1 ± 7.5   | 11.6 ± 5.7   | 11.2 ± 5.7   |
| Protocol-based Standard Therapy  | 14.8 ± 6.8    | -                 | 15.7 ± 7.9   | 11.3 ± 5.7   | 11.1 ± 5.3   |
| Usual care                       | 14.6 ± 6.7    | -                 | 15.1 ± 7.5   | 11.4 ± 5.5   | 10.6 ± 5.2   |
| p-value                          | 0.49          | -                 | 0.14         | 0.74         | 0.24         |
| <b>Vital signs</b>               |               |                   |              |              |              |
| Temperature, °C                  |               |                   |              |              |              |
| Protocol-based EGDT              | 37.6 ± 1.4    | 37 ± 1.1          | 36.8 ± 1.1   | 36.7 ± 1.3   | 36.8 ± 0.8   |
| Protocol-based Standard Therapy  | 37.6 ± 1.5    | 36.9 ± 1          | 37 ± 0.9     | 36.8 ± 0.8   | 36.8 ± 0.7   |
| Usual care                       | 37.7 ± 1.4    | 37 ± 1            | 36.9 ± 0.9   | 36.8 ± 0.9   | 36.7 ± 0.7   |
| p-value                          | 0.68          | 0.36              | 0.14         | 0.30         | 0.68         |
| Respiratory rate, breaths/min    |               |                   |              |              |              |
| Protocol-based EGDT              | 25.4 ± 7      | 21.7 ± 6.2        | 21.8 ± 6.5   | 21.1 ± 6.1   | 20.5 ± 5.7   |
| Protocol-based Standard Therapy  | 25.1 ± 7.1    | 21.7 ± 6.4        | 21.3 ± 6.4   | 20.6 ± 6     | 20.4 ± 6.1   |
| Usual care                       | 25.3 ± 7.4    | 21.9 ± 6.6        | 21.1 ± 6     | 20.7 ± 5.9   | 20.4 ± 5.1   |
| p-value                          | 0.81          | 0.87              | 0.25         | 0.53         | 0.92         |
| Heart rate, beats/min            |               |                   |              |              |              |
| Protocol-based EGDT              | 113.7 ± 22    | 98.8 ± 19.8       | 94 ± 18.9    | 90.8 ± 17.4  | 89 ± 19.5    |
| Protocol-based Standard Therapy  | 114.6 ± 22    | 97.6 ± 18.8       | 95.1 ± 19.9  | 91.3 ± 19.5  | 89.8 ± 17.1  |
| Usual care                       | 114.5 ± 23.1  | 96.9 ± 19         | 94.1 ± 18.7  | 90.2 ± 18.1  | 87.5 ± 18    |
| p-value                          | 0.82          | 0.34              | 0.64         | 0.70         | 0.19         |
| Mean blood pressure, mmHg        |               |                   |              |              |              |
| Protocol-based EGDT              | 64.9 ± 16     | 76.9 ± 12.8       | 78.9 ± 14.2  | 84.1 ± 13.9  | 86.3 ± 14.5  |
| Protocol-based Standard Therapy  | 66.1 ± 16.6   | 78.8 ± 15.4       | 80.2 ± 14.5  | 84.8 ± 16    | 86.4 ± 15.2  |
| Usual care                       | 64.7 ± 15.6   | 76.1 ± 14.4       | 78.4 ± 14.1  | 84.2 ± 15    | 86 ± 16.2    |
| p-value                          | 0.36          | 0.01 <sup>a</sup> | 0.15         | 0.78         | 0.90         |
| <b>Arterial blood gases</b>      |               |                   |              |              |              |
| Arterial pH                      |               |                   |              |              |              |
| Protocol-based EGDT              | 7.33 ± 0.12   | 7.31 ± 0.1        | 7.34 ± 0.1   | 7.36 ± 0.1   | 7.38 ± 0.1   |
| Protocol-based Standard Therapy  | 7.31 ± 0.13   | 7.31 ± 0.1        | 7.34 ± 0.1   | 7.36 ± 0.1   | 7.37 ± 0.1   |
| Usual care                       | 7.34 ± 0.13   | 7.34 ± 0.1        | 7.36 ± 0.1   | 7.38 ± 0.1   | 7.38 ± 0.1   |
| p-value                          | 0.06          | 0.02              | 0.02         | 0.36         | 0.50         |
| Arterial pCO <sub>2</sub> , mmHg |               |                   |              |              |              |
| Protocol-based EGDT              | 35.7 ± 12.4   | 35.2 ± 11.3       | 34.1 ± 9.5   | 35 ± 9.3     | 36.5 ± 9.1   |
| Protocol-based Standard Therapy  | 38.9 ± 16.4   | 37.9 ± 14.2       | 35.3 ± 12    | 36.3 ± 11.7  | 36.3 ± 9.9   |
| Usual care                       | 36.9 ± 13.8   | 37 ± 12.5         | 35.1 ± 10.1  | 34.5 ± 9.7   | 35.6 ± 10.4  |
| p-value                          | 0.06          | 0.12              | 0.40         | 0.33         | 0.80         |
| Arterial pO <sub>2</sub> , mmHg  |               |                   |              |              |              |
| Protocol-based EGDT              | 121.8 ± 88.2  | 120.7 ± 74.6      | 105.7 ± 53   | 108.2 ± 51.8 | 97.3 ± 38.5  |
| Protocol-based Standard Therapy  | 115.6 ± 92.7  | 121.6 ± 77.6      | 110.3 ± 52.8 | 105.8 ± 43.8 | 102.6 ± 36.5 |
| Usual care                       | 121.7 ± 103.7 | 123.1 ± 87.9      | 112.8 ± 66.3 | 105.1 ± 39.2 | 99.6 ± 40.8  |
| p-value                          | 0.06          | 0.12              | 0.40         | 0.33         | 0.80         |
| <b>Blood chemistry</b>           |               |                   |              |              |              |
| Sodium, mmol/L                   |               |                   |              |              |              |
| Protocol-based EGDT              | 136.1 ± 6     | 137.5 ± 5.7       | 138.3 ± 5.2  | 138.4 ± 4.8  | 139 ± 4.9    |
| Protocol-based Standard Therapy  | 136 ± 6.3     | 136.9 ± 6.4       | 138.1 ± 5    | 138.5 ± 5    | 141.8 ± 55.3 |
| Usual care                       | 136.5 ± 6.6   | 136.8 ± 6.9       | 138.3 ± 5.6  | 138.8 ± 5.3  | 139.1 ± 5.5  |
| p-value                          | 0.42          | 0.50              | 0.82         | 0.58         | 0.47         |
| Potassium, mmol/L                |               |                   |              |              |              |
| Protocol-based EGDT              | 4.3 ± 1       | 4 ± 0.8           | 4.1 ± 0.7    | 3.9 ± 0.6    | 3.8 ± 0.5    |
| Protocol-based Standard Therapy  | 4.3 ± 1       | 4.1 ± 0.9         | 4 ± 0.7      | 3.8 ± 0.6    | 3.8 ± 0.6    |
| Usual care                       | 4.3 ± 0.9     | 4 ± 0.9           | 4 ± 0.7      | 3.9 ± 0.6    | 3.7 ± 0.6    |
| p-value                          | 0.65          | 0.56              | 0.33         | 0.96         | 0.57         |

Table S2 (continued).

| Variable                                 | Baseline      | 6h            | 24h           | 48h           | 72h           |
|------------------------------------------|---------------|---------------|---------------|---------------|---------------|
| <b>Blood chemistry (continued)</b>       |               |               |               |               |               |
| Chloride, mmol/L                         |               |               |               |               |               |
| Protocol-based EGDT                      | 100.6 ± 8     | 107.7 ± 7.3   | 108.5 ± 6.9   | 108 ± 6.5     | 107.5 ± 6.8   |
| Protocol-based Standard Therapy          | 100.3 ± 7.3   | 107 ± 7.1     | 108.1 ± 6.8   | 108.3 ± 6.2   | 107.6 ± 6.3   |
| Usual care                               | 100.4 ± 7.7   | 105.8 ± 8     | 107.6 ± 7     | 107.6 ± 6.9   | 107 ± 7       |
| p-value                                  | 0.82          | 0.05          | 0.14          | 0.38          | 0.48          |
| Blood urea nitrogen, mg/dL               |               |               |               |               |               |
| Protocol-based EGDT                      | 35.1 ± 27.4   | 34.1 ± 27.6   | 28.8 ± 21.9   | 25.4 ± 20     | 23.4 ± 20.6   |
| Protocol-based Standard Therapy          | 32.5 ± 22     | 35.5 ± 42.9   | 27.3 ± 18.4   | 24.1 ± 18.4   | 22.8 ± 18.2   |
| Usual care                               | 35.6 ± 24.4   | 34.3 ± 23.4   | 30.8 ± 21.8   | 27 ± 19.7     | 25.3 ± 21.1   |
| p-value                                  | 0.15          | 0.90          | 0.05          | 0.13          | 0.27          |
| Creatinine, mg/dL                        |               |               |               |               |               |
| Protocol-based EGDT                      | 2.5 ± 2.4     | 2 ± 1.9       | 1.8 ± 1.7     | 1.6 ± 1.7     | 1.5 ± 1.5     |
| Protocol-based Standard Therapy          | 2.2 ± 1.9     | 2.2 ± 1.8     | 1.8 ± 1.7     | 1.8 ± 4.9     | 1.5 ± 1.5     |
| Usual care                               | 2.3 ± 1.9     | 2 ± 1.6       | 1.9 ± 1.7     | 1.6 ± 1.5     | 1.5 ± 1.5     |
| p-value                                  | 0.30          | 0.43          | 0.86          | 0.48          | 0.88          |
| Glucose, mg/dL                           |               |               |               |               |               |
| Protocol-based EGDT                      | 161.2 ± 122.3 | 149.4 ± 92.1  | 138.6 ± 63.7  | 126.2 ± 52.1  | 123.7 ± 51.3  |
| Protocol-based Standard Therapy          | 177.4 ± 154.3 | 162 ± 109.8   | 138.5 ± 77    | 127.3 ± 48.9  | 124.6 ± 50.6  |
| Usual care                               | 164.2 ± 119.4 | 162.3 ± 98.7  | 133 ± 63.2    | 130.1 ± 51.7  | 129.3 ± 57.8  |
| p-value                                  | 0.16          | 0.34          | 0.41          | 0.56          | 0.36          |
| <b>Hematology</b>                        |               |               |               |               |               |
| Hemoglobin, g/dL                         |               |               |               |               |               |
| Protocol-based EGDT                      | 11.8 ± 2.6    | 10 ± 2.1      | 10.2 ± 1.8    | 9.8 ± 1.8     | 9.8 ± 1.7     |
| Protocol-based Standard Therapy          | 11.8 ± 2.7    | 9.9 ± 2.3     | 10 ± 1.9      | 9.7 ± 1.7     | 9.8 ± 2.2     |
| Usual care                               | 11.6 ± 2.6    | 10 ± 2.1      | 10 ± 1.9      | 9.8 ± 1.7     | 9.9 ± 1.8     |
| p-value                                  | 0.51          | 0.74          | 0.32          | 0.90          | 0.84          |
| White blood cells, count/mm <sup>3</sup> |               |               |               |               |               |
| Protocol-based EGDT                      | 15.3 ± 11.6   | 15 ± 10.3     | 15.1 ± 10.9   | 13.2 ± 8.7    | 12.1 ± 7.8    |
| Protocol-based Standard Therapy          | 15.6 ± 10.8   | 15.8 ± 11.1   | 15.3 ± 11.7   | 13.1 ± 9.9    | 11.9 ± 8.4    |
| Usual care                               | 16.8 ± 12     | 17.8 ± 13.7   | 16.3 ± 12     | 14 ± 10.5     | 12.8 ± 9.2    |
| p-value                                  | 0.13          | 0.11          | 0.25          | 0.40          | 0.34          |
| Platelets, count/mm <sup>3</sup>         |               |               |               |               |               |
| Protocol-based EGDT                      | 219.1 ± 126.4 | 199.7 ± 132.8 | 175.5 ± 111   | 159.2 ± 106.4 | 162.4 ± 112.7 |
| Protocol-based Standard Therapy          | 231.8 ± 141.7 | 203.6 ± 134.4 | 181.9 ± 107.1 | 162.5 ± 97    | 163.4 ± 104   |
| Usual care                               | 235.8 ± 143.5 | 210.4 ± 142.9 | 187.3 ± 109.5 | 173 ± 101.9   | 172.7 ± 101.8 |
| p-value                                  | 0.18          | 0.79          | 0.30          | 0.15          | 0.38          |
| International normalized ratio           |               |               |               |               |               |
| Protocol-based EGDT                      | 1.8 ± 1.9     | 2.2 ± 2.4     | 1.9 ± 1       | 2 ± 1.8       | 1.7 ± 0.9     |
| Protocol-based Standard Therapy          | 1.6 ± 0.9     | 1.7 ± 0.8     | 1.8 ± 1       | 1.7 ± 0.9     | 1.6 ± 0.7     |
| Usual care                               | 1.7 ± 1.2     | 1.6 ± 0.7     | 1.7 ± 0.8     | 1.9 ± 1.2     | 1.7 ± 1.2     |
| p-value                                  | 0.09          | 0.01          | 0.18          | 0.05          | 0.63          |

EGDT – early goal-directed therapy; APACHE – acute physiology, age and chronic health evaluation. Data expressed as means ± SD. APACHE II scores calculated using worst values in prior 24h.<sup>4</sup> Mean values for laboratory tests and vital signs expressed where denominator is all subjects with recorded value, using the last value recorded in the time period. P-values are for overall tests across the three arms.

<sup>a</sup> The proportion of patients with a MAP >65mmHg also differed at 6h (83.1% [n=365], 84.1% [n=375], and 77.2% [n=352] for EGDT, PSC, and usual care arms, p=0.02).

**Table S3. – Protocol adherence failures.**

| <b>Protocol adherence failures by hour 6</b>                                                                          | <b>No. (%)</b>                            |
|-----------------------------------------------------------------------------------------------------------------------|-------------------------------------------|
| <b>EGDT protocol</b>                                                                                                  | <b>404 evaluable<sup>a</sup> patients</b> |
| Not fully adherent                                                                                                    | 48 (11.9%)                                |
| No ScvO <sub>2</sub> monitoring                                                                                       | 7 (1.7%)                                  |
| Failing to administer intravenous fluids despite indications of hypovolemia <sup>b</sup>                              | 12 (3.1%)                                 |
| Failing to administer high dose pressors <sup>c</sup> for hypotension despite evidence of adequate intravenous fluids | 4 (1.0%)                                  |
| Failing to administer blood transfusion despite low ScvO <sub>2</sub> after other measures performed                  | 12 (3.1%)                                 |
| Failing to administer dobutamine when indicated                                                                       | 13 (3.2%)                                 |
| <b>Standard therapy protocol</b>                                                                                      | <b>435 evaluable<sup>a</sup> patients</b> |
| Not fully adherent                                                                                                    | 19 (4.4%)                                 |
| Failing to administer intravenous fluids despite indications of hypovolemia                                           | 1 (0.2%)                                  |
| Failing to administer high dose pressors <sup>c</sup> for hypotension despite evidence of adequate intravenous fluids | 18 (4.1%)                                 |

EGDT – early goal-directed therapy.

<sup>a</sup> Reasons for not being evaluated include death, discharge or request for withdrawal of data before 6h.

<sup>b</sup> Inadequate fluids defined as: i.) <5L intravenous fluids despite low central venous pressure with either low ScvO<sub>2</sub> or hypotension, or; ii.) ≥5L intravenous fluids but persistent hypotension.

<sup>c</sup> Dopamine >15 mcg/kg/min, epinephrine >0.1 mcg/kg/min, norepinephrine >0.1 mcg/kg/min, neosynephrine >0.4 mcg/kg/min, vasopressin ≥0.4 mcg/kg/min or ≥2 vasopressors.



Table S4. – Resuscitation and processes of care from baseline to 72h.<sup>a</sup>

| Intervention                                           | Protocol-based EGDT<br>(N=439) | Protocol-based Standard<br>Therapy (N=446) | Usual care (N=456) | p-value <sup>e</sup> |
|--------------------------------------------------------|--------------------------------|--------------------------------------------|--------------------|----------------------|
| <b>Pre-randomization</b>                               |                                |                                            |                    |                      |
| Intravenous fluids <sup>b</sup> – mL                   | 2254 ± 1472                    | 2226 ± 1363                                | 2083 ± 1405        | 0.15                 |
| Fluids per body weight (mL/kg)                         | 30.5 ± 22.3                    | 29.2 ± 19.1                                | 28 ± 21            |                      |
| Vasopressor use <sup>c</sup>                           | 84 (19.1)                      | 75 (16.8)                                  | 69 (15.1)          | 0.28                 |
| Dobutamine use                                         | 0 (0)                          | 0 (0)                                      | 0 (0)              |                      |
| Blood transfusion                                      | 5 (1.1)                        | 7 (1.6)                                    | 9 (2.0)            | 0.63                 |
| Mechanical ventilation                                 | 60 (13.7)                      | 65 (14.6)                                  | 63 (13.8)          | 0.93                 |
| Intravenous antibiotics                                | 332 (75.6)                     | 343 (76.9)                                 | 347 (76.1)         | 0.91                 |
| Corticosteroids                                        | 41 (9.3)                       | 42 (9.4)                                   | 38 (8.3)           | 0.82                 |
| Activated protein C                                    | 0 (0)                          | 0 (0)                                      | 0 (0)              |                      |
| <b>Randomization to hour 6<sup>d</sup></b>             |                                |                                            |                    |                      |
| Resuscitation elements                                 |                                |                                            |                    |                      |
| Central venous catheterization                         | 411 (93.6)                     | 252 (56.5)                                 | 264 (57.9)         | <0.0001              |
| Central venous oximeter catheterization <sup>e</sup>   | 409 (93.2)                     | 18 (4.0)                                   | 16 (3.5)           | <0.0001              |
| Intravenous fluids – mL                                | 2805 ± 1957                    | 3285 ± 1743                                | 2279 ± 1881        | <0.0001              |
| Vasopressor use                                        | 241 (54.9)                     | 233 (52.2)                                 | 201 (44.1)         | 0.003                |
| Dobutamine use                                         | 35 (8)                         | 5 (1.1)                                    | 4 (0.9)            | <0.0001              |
| Blood transfusion                                      | 63 (14.4)                      | 37 (8.3)                                   | 34 (7.5)           | 0.001                |
| Ancillary care                                         |                                |                                            |                    |                      |
| Mechanical ventilation                                 | 116 (26.4)                     | 110 (24.7)                                 | 99 (21.7)          | 0.25                 |
| Tidal volume, mL/kg predicted body weight <sup>f</sup> | 8.5 ± 2.4                      | 8.1 ± 1.6                                  | 8.0 ± 1.8          | 0.11                 |
| Tidal volume, mL/kg body weight                        | 6.7 ± 2.1                      | 6.5 ± 1.9                                  | 6.8 ± 2.1          | 0.32                 |
| Intravenous antibiotics                                | 428 (97.5)                     | 433 (97.1)                                 | 442 (96.9)         | 0.90                 |
| Corticosteroids                                        | 54 (12.3)                      | 48 (10.8)                                  | 37 (8.1)           | 0.16                 |
| Activated protein C                                    | 1 (0.2)                        | 1 (0.2)                                    | 0 (0)              | 0.55                 |
| <b>Processes of care from 6-72 h</b>                   |                                |                                            |                    |                      |
| Intravenous fluids – mL                                | 4458 ± 3878                    | 4918 ± 4308                                | 4354 ± 3882        | 0.08                 |
| Vasopressor use                                        | 209 (47.6)                     | 208 (46.6)                                 | 197 (43.2)         | 0.38                 |
| Dobutamine use                                         | 19 (4.3)                       | 9 (2.0)                                    | 10 (2.2)           | 0.08                 |
| Blood transfusion                                      | 87 (19.8)                      | 93 (20.9)                                  | 82 (18.0)          | 0.54                 |
| Mechanical ventilation                                 | 148 (33.7)                     | 140 (31.4)                                 | 127 (27.9)         | 0.16                 |
| Tidal volume, mL/kg predicted body weight              | 8.5 ± 2.5                      | 8.6 ± 2.6                                  | 8.1 ± 1.8          | 0.05                 |
| Tidal volume, mL/kg body weight                        | 6.7 ± 2.3                      | 6.6 ± 2.4                                  | 6.6 ± 2.2          | 0.81                 |
| <b>Processes of care from 0-72 h</b>                   |                                |                                            |                    |                      |
| Intravenous fluids – mL                                | 7253 ± 4605                    | 8193 ± 4989                                | 6633 ± 4560        | <0.0001              |
| Vasopressor use                                        | 265 (60.4)                     | 273 (61.2)                                 | 245 (53.7)         | 0.05                 |
| Dobutamine use                                         | 41 (9.3)                       | 11 (2.5)                                   | 13 (2.9)           | <0.0001              |
| Blood transfusion                                      | 120 (27.3)                     | 107 (24.0)                                 | 102 (22.4)         | 0.22                 |
| Mechanical ventilation                                 | 159 (36.2)                     | 152 (34.1)                                 | 135 (29.6)         | 0.10                 |
| Tidal volume, mL/kg predicted body weight              | 8.5 ± 2.5                      | 8.4 ± 2.4                                  | 8.1 ± 1.8          | 0.03                 |
| Tidal volume, mL/kg body weight                        | 6.7 ± 2.2                      | 6.6 ± 2.2                                  | 6.7 ± 2.2          | 0.55                 |

EGDT – early goal-directed therapy.

<sup>a</sup> Values indicated with ± are means ± SD. Values indicated with N (n) are number of subjects (%). Denominators are all individuals for whom data are available.

<sup>b</sup> Includes all intravenous crystalloid, colloid and blood product administration.

<sup>c</sup> Vasopressor use defined as dopamine infusion at >5 mcg/kg/min or any infusion of epinephrine, norepinephrine, vasopressin or phenylephrine.

<sup>d</sup> Mechanical ventilation, central venous catheterization, and ancillary care (antibiotics, corticosteroids, and activated protein C) are counted from emergency department arrival to 6h. Resuscitation therapies (intravenous fluids, vasopressor and dobutamine infusions, and blood product administration) are counted from randomization to 6h.

<sup>e</sup> Central venous catheterization defined as use of oximetric catheter or multiple serial ScvO<sub>2</sub> measures.

<sup>f</sup> Predicted body weight (PBW) as per [http://www.ardsonet.org/system/files/pbwtables\\_2005-02-02\\_0.pdf](http://www.ardsonet.org/system/files/pbwtables_2005-02-02_0.pdf).

<sup>g</sup> P-values are for overall tests across the three arms.

**Table S5. – Serious adverse events.**

| Potential adverse event <sup>a</sup> | Protocol-based EGDT<br>(N=439) | Protocol-based Standard<br>Therapy (N=446) | Usual care (N=456) | p-value <sup>b</sup> |
|--------------------------------------|--------------------------------|--------------------------------------------|--------------------|----------------------|
| <b>Total events</b>                  | <b>23</b>                      | <b>22</b>                                  | <b>37</b>          | <b>0.32</b>          |
| Allergy/immunology                   | 0                              | 0                                          | 0                  |                      |
| Auditory/ear                         | 0                              | 0                                          | 0                  |                      |
| Blood/bone marrow                    | 0                              | 0                                          | 0                  |                      |
| Cardiac dysfunction                  | 7                              | 5                                          | 7                  |                      |
| Coagulation                          | 0                              | 0                                          | 0                  |                      |
| Constitutional symptoms              | 0                              | 0                                          | 0                  |                      |
| Dermatology/skin                     | 0                              | 0                                          | 0                  |                      |
| Endocrine                            | 0                              | 0                                          | 0                  |                      |
| Gastrointestinal                     | 0                              | 0                                          | 2                  |                      |
| Growth and development               | 0                              | 0                                          | 0                  |                      |
| Hemorrhage/bleeding                  | 0                              | 0                                          | 1                  |                      |
| Hepatobiliary/pancreas               | 0                              | 2                                          | 3                  |                      |
| Infection                            | 1                              | 3                                          | 2                  |                      |
| Lymphatics                           | 0                              | 0                                          | 0                  |                      |
| Metabolic/laboratory                 | 2                              | 3                                          | 3                  |                      |
| Musculoskeletal/soft tissue          | 0                              | 0                                          | 0                  |                      |
| Neurology                            | 2                              | 2                                          | 1                  |                      |
| Ocular/visual                        | 0                              | 0                                          | 0                  |                      |
| Pain                                 | 0                              | 0                                          | 1                  |                      |
| Pulmonary/upper respiratory          | 5                              | 5                                          | 10                 |                      |
| Renal/genitourinary                  | 5                              | 1                                          | 5                  |                      |
| Secondary malignancy                 | 0                              | 0                                          | 0                  |                      |
| Sexual/reproductive function         | 0                              | 0                                          | 0                  |                      |
| Surgery/intra operative injury       | 0                              | 0                                          | 0                  |                      |
| Vascular                             | 1                              | 1                                          | 2                  |                      |

EGDT – early goal-directed therapy; PSC – protocolized standard care.

<sup>a</sup> All reported adverse events were reviewed by the site Principal Investigator and none was deemed related to study intervention.

<sup>b</sup> P-value is for an overall test across the 3 arms.

**Table S6. – Pre-hoc subgroup-by-treatment interaction analyses.**

| Subgroup                                        | p-value for subgroup by treatment allocation interaction <sup>a</sup> |                  |                   |
|-------------------------------------------------|-----------------------------------------------------------------------|------------------|-------------------|
|                                                 | Hospital mortality at 60d                                             | Mortality at 90d | One year survival |
| Age                                             | 0.09                                                                  | 0.62             | 0.69              |
| Race                                            | 0.44                                                                  | 0.45             | 0.93              |
| Sex                                             | 0.20                                                                  | 0.44             | 0.51              |
| Source of infection                             | 0.99                                                                  | 0.66             | 0.28              |
| Type of shock (hyperlactatemia vs. hypotension) | 0.38                                                                  | 0.22             | 0.10              |

<sup>a</sup> Interactions tested by Breslow-Day test, assuming significance at p<0.05, across all three arms.

Table S7. – Post-hoc subgroup analyses.

| Criterion for subgrouping by thirds           | All            | Comparison across subgroup, p-value | Protocol-based EGDT | Protocol-based Standard Therapy | Usual care    | Subgroup by treatment interaction, p-value | Comparison across arms, p-value |
|-----------------------------------------------|----------------|-------------------------------------|---------------------|---------------------------------|---------------|--------------------------------------------|---------------------------------|
| <b>APACHE II</b>                              |                |                                     |                     |                                 |               |                                            |                                 |
| < 17                                          | 36/421 (8.6)   | <0.0001                             | 14/136 (10.3)       | 11/145 (7.6)                    | 11/140 (7.9)  | 0.79                                       | 0.71                            |
| 17-23                                         | 76/490 (15.5)  |                                     | 24/164 (14.6)       | 26/153 (17.0)                   | 26/173 (15.0) |                                            | 0.84                            |
| > 23                                          | 147/430 (34.2) |                                     | 54/139 (38.8)       | 44/148 (29.7)                   | 49/143 (34.3) |                                            | 0.27                            |
| <b>Serum lactate<sup>a</sup>, mmol/L</b>      |                |                                     |                     |                                 |               |                                            |                                 |
| < 3.4                                         | 46/430 (10.7)  | <0.0001                             | 18/145 (12.4)       | 19/152 (12.5)                   | 9/133 (6.8)   | 0.30                                       | 0.20                            |
| 3.4-5.3                                       | 78/445 (17.5)  |                                     | 20/145 (13.8)       | 22/136 (16.2)                   | 36/164 (22.0) |                                            | 0.16                            |
| > 5.3                                         | 129/429 (30.0) |                                     | 52/136 (38.2)       | 38/145 (26.2)                   | 39/148 (26.4) |                                            | 0.05                            |
| <b>Time to randomization<sup>b</sup>, min</b> |                |                                     |                     |                                 |               |                                            |                                 |
| < 47                                          | 63/440 (14.3)  | 0.01                                | 21/140 (15.0)       | 24/156 (15.4)                   | 18/144 (12.5) | 0.41                                       | 0.75                            |
| 47-87                                         | 103/454 (22.7) |                                     | 37/152 (24.3)       | 33/145 (22.8)                   | 33/157 (21.0) |                                            | 0.78                            |
| > 87                                          | 92/440 (20.9)  |                                     | 34/146 (23.3)       | 24/143 (16.8)                   | 34/151 (22.5) |                                            | 0.33                            |

Data presented as no. of hospital deaths by day 60/no. of patients (%). Tercile by treatment interaction and treatment effects tested through logistic regression with interaction terms. All analyses tested across the three treatment arms. EGDT – early goal directed therapy; APACHE II – acute physiology, age and chronic health evaluation II score.<sup>4</sup>

<sup>a</sup> Available for 97.2% (1304/1341) of patients.

<sup>b</sup> Available for 99.5% (1334/1341) of patients.

**Table S8. – Comparison of study populations across EGDT trials.**

| Characteristic                                            | Rivers, et al <sup>2</sup> | Jones, et al <sup>5</sup> | ProCESS         |
|-----------------------------------------------------------|----------------------------|---------------------------|-----------------|
| No. enrolled                                              | 263                        | 300                       | 1341            |
| Age – year                                                | 66                         | 61                        | 61 <sup>a</sup> |
| Male sex (%)                                              | 51                         | 54                        | 56              |
| Race (%)                                                  |                            |                           |                 |
| White                                                     | -                          | 55                        | 68              |
| Black or African American                                 | -                          | 34                        | 25              |
| Nursing home resident prior to admission (%)              | -                          | 19                        | 16 <sup>b</sup> |
| Chronic conditions (%) <sup>c</sup>                       |                            |                           |                 |
| Hypertension                                              | 67                         | -                         | 59              |
| Diabetes mellitus                                         | 31                         | 34                        | 34              |
| Congestive heart failure                                  | 33                         | -                         | 12              |
| Hepatic cirrhosis/liver disease                           | 23                         | -                         | 11              |
| Source of sepsis (%)                                      |                            |                           |                 |
| Pneumonia/lower respiratory tract                         | 39                         | 51                        | 33              |
| Urinary tract infection                                   | 27                         | 27                        | 21              |
| Intra-abdominal infection                                 | 7                          | 20                        | 13              |
| Blood culture positive (%)                                | 35                         | 38                        | 30              |
| APACHE II score                                           | 21                         | -                         | 21              |
| Entry criteria (%)                                        |                            |                           |                 |
| Refractory hypotension                                    | -                          | 82                        | 54              |
| Hyperlactatemia                                           | -                          | 39                        | 59              |
| Vital signs                                               |                            |                           |                 |
| Temperature (degrees Celsius)                             | 36.3                       | -                         | 37.6            |
| Respiratory rate                                          | 31                         | -                         | 25.3            |
| Heart rate                                                | 116                        | -                         | 114.3           |
| Systolic blood pressure (mmHg)                            | 108                        | 92                        | 100.7           |
| Mean arterial pressure (mmHg)                             | 75                         | -                         | 65.2            |
| Serum lactate – mmol/L                                    | 7                          | 4                         | 5               |
| Arterial blood gas                                        |                            |                           |                 |
| pH                                                        | 7.32                       | -                         | 7.33            |
| pCO <sub>2</sub> (mm Hg)                                  | 31                         | -                         | 37.1            |
| Blood chemistry                                           |                            |                           |                 |
| Blood urea nitrogen (mg/dl)                               | 46.3                       | -                         | 34.4            |
| Creatinine (mg/dl)                                        | 2.6                        | -                         | 2.3             |
| Hematology                                                |                            |                           |                 |
| Hemoglobin (g/dl)                                         | 11.5 <sup>d</sup>          | -                         | 11.7            |
| White blood cell count (x 10 <sup>9</sup> cells/ L)       | 13.9                       | -                         | 15.9            |
| Platelet count (x 10 <sup>9</sup> cells/ L)               | 213                        | -                         | 229             |
| International normalized ratio<br>(prothrombin time 16.2) | -                          | -                         | 1.7             |

EGDT – early goal-directed therapy; APACHE – acute physiology, age, and chronic health evaluation.

Values indicate means unless otherwise stated.

<sup>a</sup> Excludes one subject with missing age

<sup>b</sup> Excludes four subjects with missing domicile prior to admission. Nursing home population includes personal care homes, skilled or unskilled assisted living, or extended care facilities

<sup>c</sup> Chronic conditions defined variably across the trials

<sup>d</sup> Hematocrit is presented in the Rivers et al NEJM 2001 paper. Presented table number is hematocrit divided by 3.

## References

1. Bone RC, Balk RA, Cerra FB, et al. Definitions for sepsis and organ failure and guidelines for the use of innovative therapies in sepsis. The ACCP/SCCM Consensus Conference Committee. American College of Chest Physicians/Society of Critical Care Medicine. *Chest* 1992;101:1644-55.
2. Rivers E, Nguyen B, Havstad S, et al. Early goal-directed therapy in the treatment of severe sepsis and septic shock. *N Engl J Med* 2001;345:1368-77.
3. Charlson ME, Pompei P, Ales KL, MacKenzie CR. A new method of classifying prognostic comorbidity in longitudinal studies: development and validation. *J Chronic Dis* 1987;40:373-83.
4. Knaus WA, Draper EA, Wagner DP, Zimmerman JE. APACHE II: a severity of disease classification system. *Crit Care Med* 1985;13:818-29.
5. Jones AE, Shapiro NI, Roshon M. Implementing early goal-directed therapy in the emergency setting: the challenges and experiences of translating research innovations into clinical reality in academic and community settings. *Acad Emerg Med* 2007;14:1072-8.
